# Supplementary material for: Vagus nerve stimulation even after injury ameliorates cisplatin-induced nephropathy via reducing macrophage infiltration
Source: PubMed Central journal article supplement (PMC7290038; doi:10.1038/s41598-020-66295-0), 2020-06-11
Supplement: 41598_2020_66295_MOESM1_ESM.pdf [file 41598_2020_66295_MOESM1_ESM.pdf]

**Vagus nerve stimulation even after injury ameliorates cisplatin-induced nephropathy via  
reducing macrophage infiltration**

Rie Uni<sup>1,2</sup>, Tsuyoshi Inoue<sup>2\*</sup>, Yasuna Nakamura<sup>1</sup>, Daichi Fukaya<sup>2</sup>, Sho Hasegawa<sup>1,2</sup>, Chia-Hsien

Wu<sup>1</sup>, Rie Fujii<sup>1,2</sup>, Bongkod Surattichaiyakul<sup>2</sup>, Wachirasek Peerapanyasut<sup>3</sup>, Atsuko Ozeki<sup>4</sup>,

Nobuyoshi Akimitsu<sup>4</sup>, Youichiro Wada<sup>4</sup>, Masaomi Nangaku<sup>1</sup>, Reiko Inagi<sup>2</sup>

1 Division of Nephrology and Endocrinology, The University of Tokyo Graduate

School of Medicine, Bunkyo-ku, Tokyo, 113-8655, Japan, 2 Division of CKD

Pathophysiology, The University of Tokyo Graduate School of Medicine, Bunkyo-ku,

Tokyo, 113-8655, Japan, 3 Mahidol University, Nakhonsawan Campus, Nakhonsawan, 60130,

Thailand, 4 Isotope Science Center, The University of Tokyo, Bunkyo-ku, Tokyo, 113-0032, Japan

\*Corresponding author

Corresponding to [tsinoue-tky@umin.ac.jp](mailto:tsinoue-tky@umin.ac.jp)

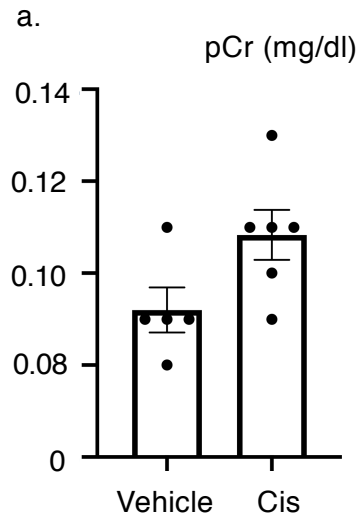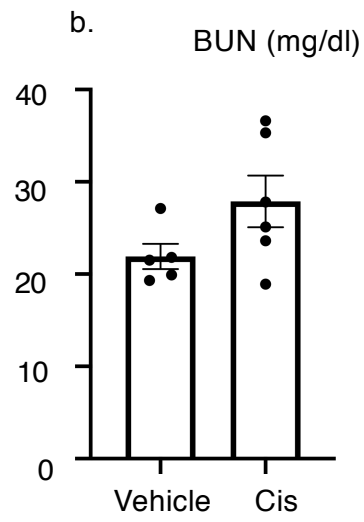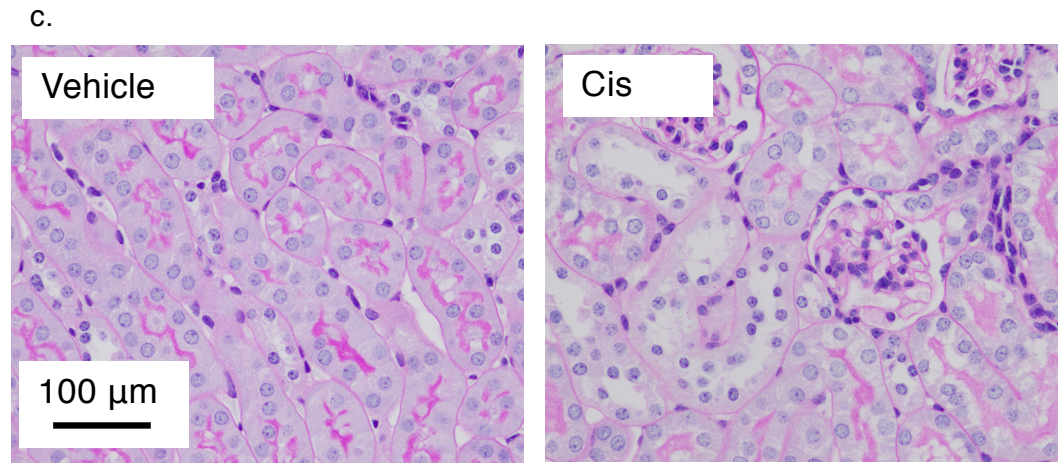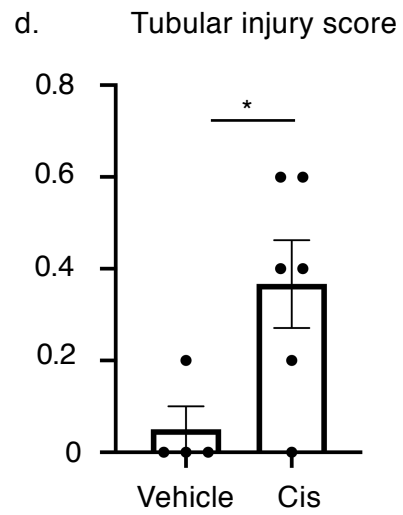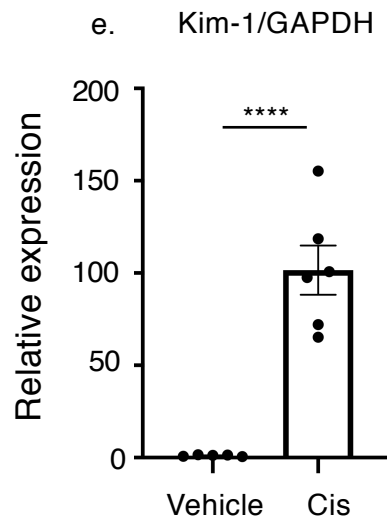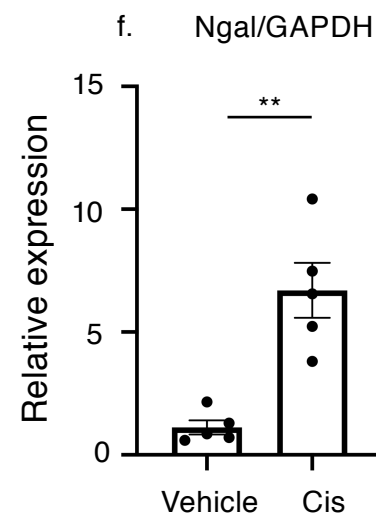

## Supplementary Figure 1

Kidney injury is already established 24 hours after cisplatin injection.

(a, b) Plasma creatinine and BUN levels were elevated 24 hours after cisplatin injection, but the increases were not statistically significant (plasma creatinine:  $0.09 \pm 0.00$  and  $0.11 \pm 0.01$  mg/dl,  $P=0.056$ ; BUN:  $21.9 \pm 1.2$  and  $27.9 \pm 2.6$  mg/dl,  $P=0.11$ ; for vehicle and cisplatin group, respectively;  $n=4$  or  $5$ ). (c, d) Representative pictures of PAS staining and tubular injury score. Cisplatin caused tubular injury only 24 hours after its administration (tubular injury score:  $0.05 \pm 0.04$  and  $0.37 \pm 0.10$  for vehicle group and cisplatin group, respectively;  $P=0.036$ ). (e, f) The expression levels of the early kidney injury markers Kim-1 and Ngal mRNAs in the kidney were also increased (relative expression of Kim-1:  $1.10 \pm 0.19$  and  $101.6 \pm 12.2$ ,  $P<0.0001$ ; relative expression of Ngal:  $1.12 \pm 0.25$  and  $6.67 \pm 1.00$ ,  $P=0.0013$ ; for vehicle group and cisplatin group, respectively;  $n=5$  or  $6$ ).

Data are expressed as mean  $\pm$  SEM and analyzed using a Student's t test.

\* $P < 0.05$ , \*\* $P < 0.01$ , \*\*\*\*  $P < 0.0001$

Cis, cisplatin; pCr, plasma creatinine; BUN, blood urea nitrogen; SEM, standard error of the mean

Scale bar, 100  $\mu$ m.

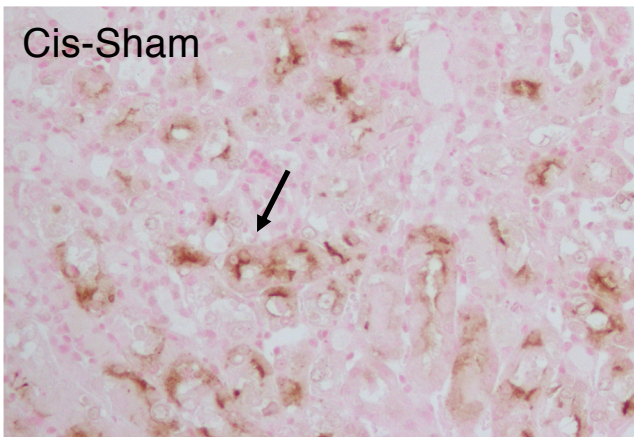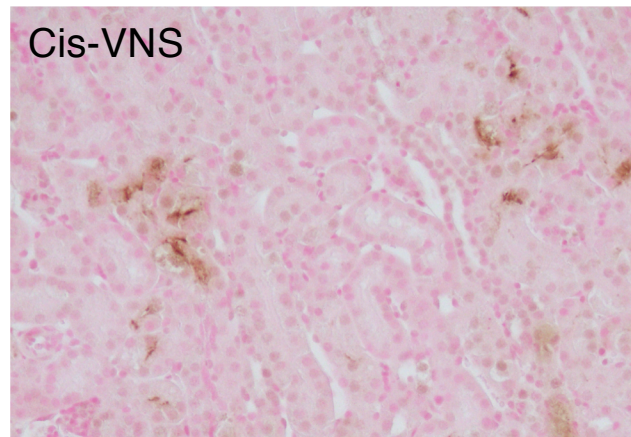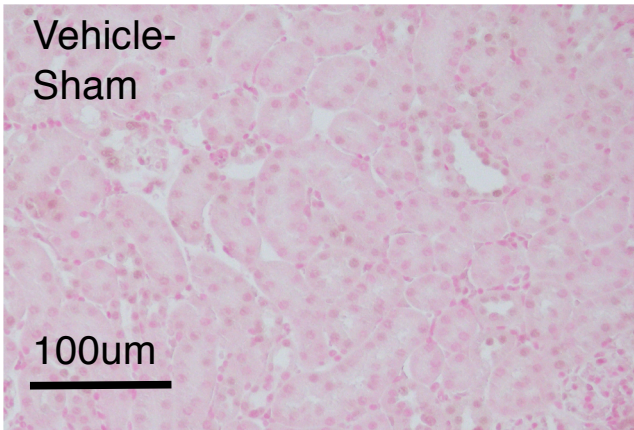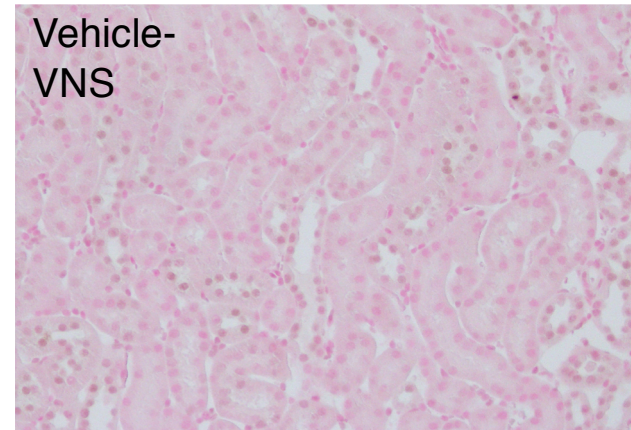

## **Supplementary Figure 2**

High power field view of Kim-1 immunohistochemistry (Figure 1d).

VNS was applied 24 hours after intraperitoneal single injection of cisplatin (25 mg/kg).

Black arrow indicates Kim-1-positive area stained with brown.

Cis, cisplatin; VNS, Vagus nerve stimulation

Scale bar, 100  $\mu$ m.
