# Supplementary material for: Vagus nerve stimulation even after injury ameliorates cisplatin-induced nephropathy via reducing macrophage infiltration
Source: PubMed Central journal article supplement (PMC7290038; doi:10.1038/s41598-020-66295-0), 2020-06-11
Supplement: 41598_2020_66295_MOESM2_ESM.pdf [file 41598_2020_66295_MOESM2_ESM.pdf]

**Vagus nerve stimulation even after injury ameliorates cisplatin-induced nephropathy via  
reducing macrophage infiltration**

Rie Uni<sup>1,2</sup>, Tsuyoshi Inoue<sup>2\*</sup>, Yasuna Nakamura<sup>1</sup>, Daichi Fukaya<sup>2</sup>, Sho Hasegawa<sup>1,2</sup>, Chia-Hsien

Wu<sup>1</sup>, Rie Fujii<sup>1,2</sup>, Bongkod Surattichaiyakul<sup>2</sup>, Wachirasek Peerapanyasut<sup>3</sup>, Atsuko Ozeki<sup>4</sup>,

Nobuyoshi Akimitsu<sup>4</sup>, Youichiro Wada<sup>4</sup>, Masaomi Nangaku<sup>1</sup>, Reiko Inagi<sup>2</sup>

1 Division of Nephrology and Endocrinology, The University of Tokyo Graduate

School of Medicine, Bunkyo-ku, Tokyo, 113-8655, Japan, 2 Division of CKD

Pathophysiology, The University of Tokyo Graduate School of Medicine, Bunkyo-ku,

Tokyo, 113-8655, Japan, 3 Mahidol University, Nakhonsawan Campus, Nakhonsawan, 60130,

Thailand, 4 Isotope Science Center, The University of Tokyo, Bunkyo-ku, Tokyo, 113-0032, Japan

\*Corresponding author

Corresponding to [tsinoue-tky@umin.ac.jp](mailto:tsinoue-tky@umin.ac.jp)

**Supplementary Table 1**

Various inflammatory cytokine expression levels in plasma (mean, pg/ml).

|                | Vehicle-Sham | (SD)  | Vehicle-VNS | (SD)  | Cis-Sham | (SD)  | Cis-VNS | (SD)  |
|----------------|--------------|-------|-------------|-------|----------|-------|---------|-------|
| IL-1 $\alpha$  | 20.3         | 6.6   | 43.7        | 25.1  | 19.4     | 17.2  | 15.3    | 16.5  |
| CCL11          | 715.8        | 247.8 | 843.0       | 167.6 | 2565.5   | 787.0 | 1559.1* | 397.6 |
| G-CSF          | 402.9        | 97.5  | 351.5       | 254.0 | 1010.4   | 551.9 | 355.4*  | 239.4 |
| IL-12(p40)     | 529.7        | 148.2 | 355.6       | 90.8  | 1154.1   | 350.6 | 723.1*  | 305.8 |
| IL-10          | 34.6         | 14.0  | 16.1        | 17.3  | 71.5     | 34.9  | 64.8    | 34.4  |
| IL-6           | 13.3         | 5.2   | 6.8         | 5.0   | 23.0     | 10.2  | 15.2    | 10.8  |
| CCL2           | 238.3        | 54.2  | 104.5       | 52.2  | 368.9    | 128.1 | 282.0*  | 131.9 |
| IL-2           | 9.0          | 1.8   | 4.0         | 2.1   | 11.3     | 5.1   | 9.1     | 4.5   |
| IL-5           | 19.5         | 6.0   | 10.2        | 6.7   | 25.3     | 13.3  | 17.2    | 7.1   |
| RANTES         | 107.7        | 21.5  | 78.9        | 44.1  | 127.9    | 31.2  | 102.6   | 43.3  |
| KC             | 202.2        | 33.8  | 106.7       | 51.4  | 169.8    | 46.7  | 191.1   | 54.4  |
| IL-9           | 58.2         | 12.2  | 33.8        | 20.1  | 34.8     | 19.3  | 65.0    | 68.9  |
| MIP-1 $\beta$  | 156.8        | 23.4  | 110.0       | 43.4  | 128.2    | 31.0  | 146.2   | 39.9  |
| IL-13          | 229.1        | 44.9  | 124.3       | 64.9  | 158.2    | 68.9  | 195.4   | 151.5 |
| MIP-1 $\alpha$ | 11.6         | 2.1   | 6.9         | 3.4   | 6.9      | 2.6   | 8.8     | 3.3   |
| IL-17          | 27.2         | 7.5   | 13.9        | 8.9   | 15.0     | 6.7   | 19.8    | 7.8   |
| GM-CSF         | 94.3         | 21.2  | 55.6        | 34.2  | 57.8     | 22.4  | 76.4    | 23.9  |
| IL-4           | 9.5          | 2.1   | 4.5         | 2.9   | 4.9      | 2.6   | 7.1     | 3.9   |
| IL-3           | 6.8          | 2.2   | 3.5         | 1.6   | 3.6      | 1.9   | 5.2     | 2.6   |
| IL-1 $\beta$   | 45.0         | 10.0  | 19.8        | 13.1  | 23.7     | 13.0  | 30.2    | 13.8  |
| TNF- $\alpha$  | 156.7        | 36.0  | 68.7        | 50.1  | 81.8     | 41.4  | 111.8   | 58.1  |
| IFN- $\gamma$  | 95.1         | 18.7  | 57.5        | 33.2  | 48.4     | 30.5  | 73.9    | 31.9  |
| IL-12(p70)     | 461.9        | 113.1 | 411.5       | 375.5 | 231.6    | 125.0 | 353.5   | 147.3 |

\*Decreased by VNS significantly compared to Cis-sham group. (CCL11: P<0.0001, G-CSF: P=0.0002,

IL-12(p40): P=0.0009, CCL2: P=0.0325) (two-way analysis of variance followed by Sidak post-hoc

test)

VNS, vagus nerve stimulation; Cis, cisplatin; SD, standard deviation
